# Supplementary material for: Integrating Patient and Public Involvement into Simulation- Based Learning for Adrenal Conditions: A Mixed-Methods Study
Source: Research Square preprint supplement (doi:10.21203/rs.3.rs-6968791/v1), 2025-08-11
Supplement: Supplementary file 1 [file 46951e7f1ae2fe8190987581.pdf]

# Post-SIMBA evaluation for SIMBA Adrenal 2025 Day 1

Please complete this questionnaire with spontaneous answers to reflect your true response. The information will be anonymised during analysis for presentation and publication .

A certificate of attendance will be sent to the email you have provided after completion of this evaluation.

\* Indicates required question

---

1. SIMBA ID \*

\*Assigned SIMBA ID Number available in sent email

---

2. Name (as you would like it to be on the attendance certificate) \*

---

3. Email address (to which you want your attendance certificate to be sent) \*

---

4. What is your gender \*

*Mark only one oval.*

Female

Male

Prefer not to say

Other: \_\_\_\_\_

5. Level of training

*Mark only one oval.*

- Foundation Year 1/Intern
- Foundation Year 2/SHO
- Internal Medicine Training
- Core Medical Training 1
- Core Medical Training 2
- Specialty Training 3
- Specialty Training 4
- Specialty Training 5
- Specialty Training 6
- Specialty Training 7
- Out of Programme
- Consultant
- House Officer
- Medical Officer
- Resident Physician
- Senior Resident/Fellowship
- Other: \_\_\_\_\_





8. How clinically and intellectually stimulating was each of these cases \*

*Mark only one oval per row.*

|                                       | Very stimulating      | stimulating           | Somewhat stimulating  | undecided             | somewhat boring       | boring                | Very boring           |
|---------------------------------------|-----------------------|-----------------------|-----------------------|-----------------------|-----------------------|-----------------------|-----------------------|
| <b>Congenital Adrenal Hyperplasia</b> | <input type="radio"/> |
| <b>Adrenal Incidentaloma</b>          | <input type="radio"/> |
| <b>Adrenocortical Carcinoma</b>       | <input type="radio"/> |
| <b>Phaeochromocytoma</b>              | <input type="radio"/> |

Takeaway points from the session

9. The simulated topics are applicable to my practice \*

*Mark only one oval.*

Strongly agree

Agree

Agree somewhat

Undecided

Disagree somewhat

Disagree

Strongly disagree

10. Which of the following competency areas do you feel have been improved by today's teaching with SIMBA? (tick as many \* as appropriate)

*Mark only one oval per row.*

|                                        | Yes                   | No                    |
|----------------------------------------|-----------------------|-----------------------|
| <b>Patient care</b>                    | <input type="radio"/> | <input type="radio"/> |
| <b>Professionalism</b>                 | <input type="radio"/> | <input type="radio"/> |
| <b>Knowledge on patient management</b> | <input type="radio"/> | <input type="radio"/> |
| <b>System-based practice</b>           | <input type="radio"/> | <input type="radio"/> |
| <b>Practice-based learning</b>         | <input type="radio"/> | <input type="radio"/> |

11. As a result of what I have learned today, I intend to make the following changes to my practice that I believe will impact my patients' care in a positive way:

---

---

---

---

---











18. How would you rate the overall quality of this SIMBA teaching session? \*

*Mark only one oval.*

Excellent

Good

Fair

Poor

Very Poor



compared to  
traditional  
lecture-based  
learning

---

---

20. How would you rate the ease of your interaction with your moderator? \*

*Mark only one oval.*

1 2 3 4 5 6 7 8 9 10

---

---

21. Congenital Adrenal Hyperplasia: Dr Jan Idkowiak provided a balanced (evidence-based where possible) approach to the case simulated. \*

*Mark only one oval.*

- Strongly agree
- Agree
- Agree somewhat
- Undecided
- Strongly disagree

22. Adrenal Incidentaloma: Dr Ruth Casey provided a balanced (evidence-based where possible) approach to the case simulated. \*

*Mark only one oval.*

- Strongly agree
- Agree
- Agree somewhat
- Undecided
- Strongly Disagree

23. Adrenocortical Carcinoma: Dr Vasilis Chortis provided a balanced (evidence-based where possible) approach to the case simulated. \*

*Mark only one oval.*

- Strongly agree
- Agree
- Agree somewhat
- Undecided
- Strongly Disagree

24. Pheochromocytoma: Dr John Ayuk provided a balanced (evidence-based where possible) approach to the case simulated. \*

*Mark only one oval.*

- Strongly agree
- Agree
- Agree somewhat
- Undecided
- Strongly Disagree

25. Please comment on the patient and public involvement during the session. How useful to your clinical practice and learning was this? \*

---

26. Will you attend future similar SIMBA sessions? \*

*Mark only one oval.*

- Yes
- No
- Maybe

27. The length of each simulation was reasonable (Please add comments in free text if applicable) \*

*Mark only one oval.*

Yes

No

Other: \_\_\_\_\_

28. Please write down any additional comments regarding chair's contribution

---

---

---

---

---

29. Kindly let us know if you have any suggestions to make future sessions better

---

---

---

---

---

30. What areas in endocrine would you like SIMBA to cover in the future?

---

Feedback regarding future SIMBA Patient and Public Involvement session layout

31. Which of the following session layouts would you prefer for future SIMBA PPI sessions? \*

*Mark only one oval.*

- Simulation followed by discussion held virtually only
- Case simulation followed by discussion held in-person only
- Case simulation held virtually over 2 half days followed by 1 day of in-person discussion
- Case simulation held virtually over 1 full day followed by 1 day of in-person discussion

General Data Protection

32. We would like to save your contact information to inform you about future SIMBA and related events. We respect your trust and protect your privacy, and therefore will never sell or share this data with any third parties outside of the University of Birmingham and our SIMBA team members. If you have any questions, complaints or change your mind, contact [simbasimulation@gmail.com](mailto:simbasimulation@gmail.com). Please confirm below your consent for us to save your contact details. \*

*Mark only one oval.*

- Yes
- No

You have completed this evaluation. Thank you for your time!

---

This content is neither created nor endorsed by Google.

Google Forms
