# Supplementary material for: Integrating Patient and Public Involvement into Simulation- Based Learning for Adrenal Conditions: A Mixed-Methods Study
Source: Research Square preprint supplement (doi:10.21203/rs.3.rs-6968791/v1), 2025-08-11
Supplement: Supplementary file 2 [file 5483a24c260cda1997a8cf4f.pdf]

# Pre-SIMBA survey for SIMBA Adrenal 2025 Day 2

Please complete this questionnaire with spontaneous answers to reflect your true response. The information will be anonymous during analysis and results will be amalgamated during presentation and publication.

\* Indicates required question

---

1. SIMBA ID \*

\*Assigned SIMBA ID Number available in the email we sent you

---

2. Is this your first time participating in a SIMBA session? \*

*Mark only one oval.*

Yes

No

3. Which city do you work in? \*

---

4. Which country do you work in? \*

Dropdown

*Mark only one oval.*

- Afghanistan
- Albania
- Algeria
- Andorra
- Angola
- Antigua and Barbuda
- Argentina
- Armenia
- Australia
- Austria
- Azerbaijan
- Bahamas
- Bahrain
- Bangladesh
- Barbados
- Belarus
- Belgium
- Belize
- Benin
- Bhutan
- Bolivia

- Bosnia and Herzegovina
- Botswana
- Brazil
- Brunei
- Bulgaria
- Burkina Faso
- Burundi
- Cabo Verde
- Cambodia
- Cameroon
- Canada
- Central African Republic (CAR)
- Chad
- Chile
- China
- Colombia
- Comoros
- Congo, Democratic Republic of the
- Congo, Republic of the
- Costa Rica
- Cote d'Ivoire
- Croatia
- Cuba
- Cyprus

- Czechia
- Denmark
- Djibouti
- Dominica
- Dominican Republic
- Ecuador
- Egypt
- El Salvador
- Equatorial Guinea
- Eritrea
- Estonia
- Eswatini
- Ethiopia
- Fiji
- Finland
- France
- Gabon
- Gambia
- Georgia
- Germany
- Ghana
- Greece
- Grenada
- Guatemala

- Guinea
- Guinea-Bissau
- Guyana
- Haiti
- Honduras
- Hungary
- Iceland
- India
- Indonesia
- Iran
- Iraq
- Ireland
- Israel
- Italy
- Jamaica
- Japan
- Jordan
- Kazakhstan
- Kenya
- Kiribati
- Kosovo
- Kuwait
- Kyrgyzstan
- Laos

- Latvia
- Lebanon
- Lesotho
- Liberia
- Libya
- Liechtenstein
- Lithuania
- Luxembourg
- Madagascar
- Malawi
- Malaysia
- Maldives
- Mali
- Malta
- Marshall Islands
- Mauritania
- Mauritius
- Mexico
- Micronesia
- Moldova
- Monaco
- Mongolia
- Montenegro
- Morocco

- Mozambique
- Myanmar
- Namibia
- Nauru
- Nepal
- Netherlands
- New Zealand
- Nicaragua
- Niger
- Nigeria
- North Korea
- North Macedonia
- Norway
- Oman
- Pakistan
- Palau
- Palestine
- Panama
- Papua New Guinea
- Paraguay
- Peru
- Philippines
- Poland
- Portugal

- Qatar
- Romania
- Russia
- Rwanda
- Saint Kitts and Nevis
- Saint Lucia
- Saint Vincent and the Grenadines
- Samoa
- San Marino
- Sao Tome and Principe
- Saudi Arabia
- Senegal
- Serbia
- Seychelles
- Sierra Leone
- Singapore
- Slovakia
- Slovenia
- Solomon Islands
- Somalia
- South Africa
- South Korea
- South Sudan
- Spain

- Sri Lanka
- Sudan
- Suriname
- Sweden
- Switzerland
- Syria
- Taiwan
- Tajikistan
- Tanzania
- Thailand
- Timor-Leste
- Togo
- Tonga
- Trinidad and Tobago
- Tunisia
- Turkey
- Turkmenistan
- Tuvalu
- Uganda
- Ukraine
- United Arab Emirates (UAE)
- United Kingdom (UK)
- United States of America (USA)
- Uruguay

Uzbekistan

Vanuatu

Vatican City

Venezuela

Vietnam

Yemen

Zambia

Zimbabwe

5. I am confident in my approach to investigate and manage patients with: \*

Mark only one oval per row.

|                                                                          | Strongly agree        | Agree                 | Agree somewhat        | Undecided             | Disagree somewhat     | Disagree              | Strongly disagree     |
|--------------------------------------------------------------------------|-----------------------|-----------------------|-----------------------|-----------------------|-----------------------|-----------------------|-----------------------|
| <b>Mild Autonomous Cortisol Secretion (MACS)</b>                         | <input type="radio"/> |
| <b>Cushing's Syndrome</b>                                                | <input type="radio"/> |
| <b>Primary Bilateral Macronodular Adrenocortical Hyperplasia (PBMAH)</b> | <input type="radio"/> |
| <b>Primary Aldosteronism</b>                                             | <input type="radio"/> |

This content is neither created nor endorsed by Google.

Google Forms
